# Supplementary material for: The burden of chronic mercury intoxication in artisanal small-scale gold mining in Zimbabwe: data availability and preliminary estimates
Source: PubMed Central journal article supplement (PMC4290131; doi:10.1186/1476-069x-13-111), 2014-12-13
Supplement: 12940_2014_818_MOESM1_ESM.pdf [file 12940_2014_818_MOESM1_ESM.pdf]

## Additional files

### Additional file 1 – Parameter variation in the scenario analysis

| Scenario                                                                                                                                                                                                                                                                                                                                                                                                                                                                                                                                      | Incidence (%) <sup>*</sup> | DW <sup>#</sup> | Case fatality | Age weights <sup>**</sup> | Discount rate <sup>**</sup> | Other variation                            | DALYs / 1,000 <sup>***</sup> |
|-----------------------------------------------------------------------------------------------------------------------------------------------------------------------------------------------------------------------------------------------------------------------------------------------------------------------------------------------------------------------------------------------------------------------------------------------------------------------------------------------------------------------------------------------|----------------------------|-----------------|---------------|---------------------------|-----------------------------|--------------------------------------------|------------------------------|
| Main analysis                                                                                                                                                                                                                                                                                                                                                                                                                                                                                                                                 | 2.12                       | 0.180           | 0             | used                      | used                        | -                                          | 8                            |
| Scenario analysis                                                                                                                                                                                                                                                                                                                                                                                                                                                                                                                             |                            |                 |               |                           |                             |                                            |                              |
| 1                                                                                                                                                                                                                                                                                                                                                                                                                                                                                                                                             | <b>1.85</b>                | 0.180           | 0             | used                      | used                        | -                                          | 7                            |
| 2                                                                                                                                                                                                                                                                                                                                                                                                                                                                                                                                             | <b>3.37</b>                | 0.180           | 0             | used                      | used                        | -                                          | 12                           |
| 3                                                                                                                                                                                                                                                                                                                                                                                                                                                                                                                                             | 2.12                       | 0.180           | -             | used                      | used                        | <b>Mortality = 0</b>                       | 9                            |
| 4                                                                                                                                                                                                                                                                                                                                                                                                                                                                                                                                             | 2.12                       | 0.180           | -             | used                      | used                        | <b>RR mortality = 1</b>                    | 8                            |
| 5                                                                                                                                                                                                                                                                                                                                                                                                                                                                                                                                             | 2.12                       | 0.180           | 0             | used                      | used                        | <b>+10% of modeled duration of disease</b> | 8                            |
| 6                                                                                                                                                                                                                                                                                                                                                                                                                                                                                                                                             | 2.12                       | 0.180           | 0             | used                      | used                        | <b>-10% of modeled duration of disease</b> | 7                            |
| 7                                                                                                                                                                                                                                                                                                                                                                                                                                                                                                                                             | 2.12                       | 0.180           | 0             | <b>omitted</b>            | <b>omitted</b>              | -                                          | 9                            |
| 8                                                                                                                                                                                                                                                                                                                                                                                                                                                                                                                                             | 2.12                       | <b>0.134</b>    | 0             | used                      | used                        | -                                          | 6                            |
| <p>* Modeled using DisMod II. The scenario range of the incidence included here is the result of the scenario analysis of the underlying prevalence which was fed into DisMod II.</p> <p>** Age weights: non-uniform; discount rate: 3% [1, 2].</p> <p>*** Numbers are rounded.</p> <p># DW for alcohol dependence: 0.180 [3]; DW for alcohol use disorders: 0.134 [1].</p> <p><b>Highlighted in bold: varied parameter</b></p> <p>DALYs: disability-adjusted life years; DW: disability weight; RR mortality: relative risk of mortality</p> |                            |                 |               |                           |                             |                                            |                              |

## References

1. WHO (World Health Organization): **The Global Burden of Disease: 2004 update**. Geneva; 2008.
2. Pruss-Ustun A, Mathers C, Corvalan C, Woodward A: **Introduction and methods: Assessing the environmental burden of disease at national and local levels. Environmental Burden of Disease Series, No. 1**. Geneva: WHO (World Health Organization); 2003.
3. Murray CJ, Lopez AD: **The global burden of disease: a comprehensive assessment of mortality and disability from diseases, injuries, and risk factors in 1990 and projected to 2020**. Boston: Harvard School of Public Health on behalf of the WHO (World Health Organization) and the World Bank; 1996.
