# Supplementary material for: The burden of chronic mercury intoxication in artisanal small-scale gold mining in Zimbabwe: data availability and preliminary estimates
Source: PubMed Central journal article supplement (PMC4290131; doi:10.1186/1476-069x-13-111), 2014-12-13
Supplement: 12940_2014_818_MOESM2_ESM.pdf [file 12940_2014_818_MOESM2_ESM.pdf]

## Additional files

### Additional file 2 – Summary of sociodemographic characteristics

| Character-istic              | Controls           |                          |        | Occupationally exposed      |                          |      |        |                             |
|------------------------------|--------------------|--------------------------|--------|-----------------------------|--------------------------|------|--------|-----------------------------|
|                              | Total (percentage) | Male/female (percentage) |        | Total (percentage)          | Male/female (percentage) |      |        |                             |
| Total sample                 | 91 (100%)          | 24/67 (26%/74%)          |        | 181 (100%)                  | 122/59 (67%/33%)         |      |        |                             |
| 2004 survey                  | 48 (53%)           | 24/24 (50%/50%)          |        | 155 (86%)                   | 122/33 (79%/21%)         |      |        |                             |
| 2006 survey                  | 43 (47%)           | 0/43 (0%/100%)           |        | 26 (14%)                    | 0/26 (0%/100%)           |      |        |                             |
| Character-istic              | Controls           |                          |        |                             | Occupationally exposed   |      |        |                             |
|                              | Range (min-max)    | Mean                     | Median | 95 <sup>th</sup> percentile | Range (min-max)          | Mean | Median | 95 <sup>th</sup> percentile |
| Age distribution (years)     | 11-59              | 24                       | 23     | 39                          | 9-75                     | 27   | 25     | 46                          |
| Years living in the area     | 0-59               | 11                       | 6      | 35                          | 0-59                     | 9    | 5      | 27                          |
| Years of exposure to mercury | 0                  | 0                        | 0      | 0                           | 1-23                     | 4    | 3      | 12                          |

Data sources: The data were taken from the Global Mercury Project (GMP) conducted by UNIDO in Zimbabwe in 2004 [1, 2], and from a health and biomonitoring project focusing on women of child-bearing age and their infants conducted by the University of Munich (LMU; Germany) in Zimbabwe in 2006 [3].

## References

1. Bose-O'Reilly S, Dahlmann F, Lettmeier B, Drasch G: **Removal of barriers to the introduction of cleaner artisanal gold mining and extraction technologie in Kadoma, Zimbabwe – Final Report, Part B Health Assessment.** Orléans: Bureau de Recherches Géologiques et Minières (BRGM); 2004.
2. Bose-O'Reilly S, Lettmeier B, Gothe RM, Beinhoff C, Siebert U, Drasch G: **Mercury as a serious health hazard for children in gold mining areas.** *Environ Res* 2008, **107**(1):89-97.
3. Baeuml J, Bose-O'Reilly S, Matteucci Gothe R, Lettmeier B, Roider G, Drasch G, Siebert U: **Human Biomonitoring Data from Mercury Exposed Miners in Six Artisanal Small-Scale Gold Mining Areas in Asia and Africa.** *Minerals* 2011, **1**:122-143.
